# Supplementary material
Source: PubMed Central journal article supplement (PMC6154446)
Supplement: Supp_Table1.pdf [file Supp_Table1.pdf]

SUPPLEMENTARY TABLE S1. ICD-9 AND CPT CODES

| <i>Comorbidities</i>                                                                                      | <i>ICD-9</i> |
|-----------------------------------------------------------------------------------------------------------|--------------|
| Diabetes                                                                                                  | 250.xx       |
| Hyperlipidemia                                                                                            | 272.xx       |
| Hypertension                                                                                              | 401.xx       |
| Coronary artery disease/myocardial infarction                                                             | 410–414.xx   |
| Congestive heart failure                                                                                  | 428.xx       |
| Cerebrovascular disease                                                                                   | 430–438.xx   |
| Atrial fibrillation                                                                                       |              |
| <i>Thyroid disease</i>                                                                                    | <i>ICD-9</i> |
| Hyperthyroidism                                                                                           | 242.xx       |
| Congenital hypothyroidism                                                                                 | 243.xx       |
| Hypothyroidism                                                                                            | 244.xx       |
| Thyroiditis                                                                                               | 245.xx       |
| <i>Surgery/RAI</i>                                                                                        | <i>CPT</i>   |
| Partial thyroid lobectomy, unilateral; with or without isthmusectomy                                      | 60210        |
| Partial thyroid lobectomy, unilateral; with contralateral subtotal lobectomy, including isthmusectomy     | 60212        |
| Total thyroid lobectomy, unilateral; with or without isthmusectomy                                        | 60220        |
| Total thyroid lobectomy, unilateral; with contralateral subtotal lobectomy, including isthmusectomy       | 60225        |
| Thyroidectomy, total or complete                                                                          | 60240        |
| Thyroidectomy, total or subtotal for malignancy; with limited neck dissection                             | 60252        |
| Thyroidectomy, total or subtotal for malignancy; with radical neck dissection                             | 60254        |
| Thyroidectomy, removal of all remaining thyroid tissue following previous removal of a portion of thyroid | 60260        |
| Thyroidectomy, including substernal thyroid; sternal split or transthoracic approach                      | 60270        |
| Thyroidectomy, including substernal thyroid; cervical approach                                            | 60271        |
| Thyroid <sup>131</sup> I ablation or hyperthyroid treatment                                               | 79005        |
