# Supplementary material
Source: PubMed Central journal article supplement (PMC6154446)
Supplement: Supp_Table2.pdf [file Supp_Table2.pdf]

SUPPLEMENTARY TABLE S2. CARDIOVASCULAR  
MEDICATIONS

---

ACE inhibitors

Amiodarone

ARBs

Beta blockers

Calcium channel blockers

(dihydropyridine and nondihydropyridine)

Digoxin

Fibrates

Loop diuretic

Niacin

Statins

Thiazide diuretic

---
