# Supplementary material
Source: PubMed Central journal article supplement (PMC6154446)
Supplement: Supp_Table3.pdf [file Supp_Table3.pdf]

SUPPLEMENTARY TABLE S3. INCIDENCE RATES, EVENTS/1000 PERSON-YEARS

|                      | <i># of events</i> | <i>Risk time</i> | <i>Unadjusted incidence rates [CI]</i> | <i>Adjusted incidence rates [CI]</i> | <i>Cumulative incidence rates [CI]</i> |
|----------------------|--------------------|------------------|----------------------------------------|--------------------------------------|----------------------------------------|
| Overall cohort       | 13,023             | 4.76             | 0.025 [0–0.082]                        | 0.024 [0–0.08]                       | 0.0857 [0.0833–0.0881]                 |
| Hypothyroid          | 838                | 4.79             | 0.027 [0.002–0.084]                    | 0.025 [0.002–0.082]                  | 0.0848 [0.0824–0.0873]                 |
| Euthyroid            | 12,185             | 4.4              | 0.025 [0–0.081]                        | 0.023 [0–0.08]                       | 0.1012 [0.0907–0.1122]                 |
| Hypothyroid with CHF | 6                  | 4.29             | 0.024 [0–0.279]                        | 0.024 [0–0.279]                      | 0.1629 [0.1250–0.2053]                 |
| Euthyroid with CHF   | 118                | 3.73             | 0.034 [0.016–0.051]                    | 0.028 [0.011–0.045]                  | 0.1662 [0.1279–0.2089]                 |
| Hypothyroid w/o CHF  | 832                | 4.40             | 0.027 [0–0.121]                        | 0.025 [0–0.12]                       | 0.0844 [0.0820–0.0869]                 |
| Euthyroid w/o CHF    | 12,067             | 4.79             | 0.024 [0–0.079]                        | 0.023 [0–0.078]                      | 0.1006 [0.0901–0.1117]                 |

CHF, congestive heart failure; w/o, without.
