# Supplementary material
Source: PubMed Central journal article supplement (PMC6154446)

## Supplementary Data

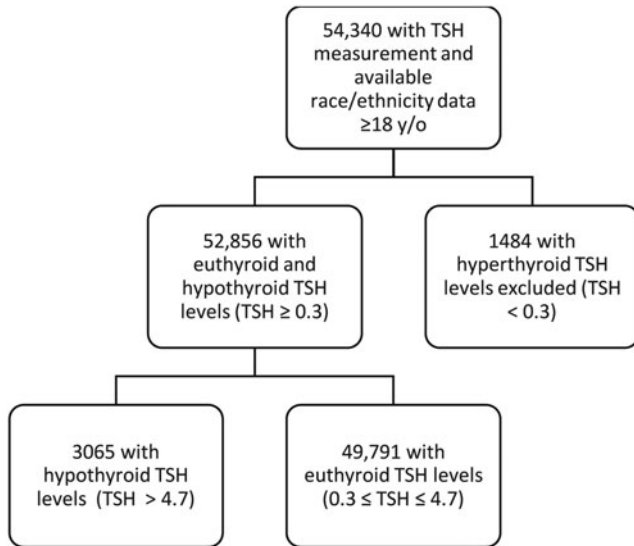

**SUPPLEMENTARY FIG. S1.** Study cohort creation. TSH, thyrotropin; y/o, years old.

Supplement: Supp_Fig1.pdf [file Supp_Fig1.pdf]
